# Supplementary material
Source: PubMed Central journal article supplement (PMC3127539)
Supplement: supp_mol.111.071555_Supplementary_material_Mol_Pharmacol.pdf [file supp_mol.111.071555_Supplementary_material_Mol_Pharmacol.pdf]

## **Molecular Pharmacology manuscript #71555**

**The diamidine diminazene aceturate is a substrate for the High Affinity Pentamidine Transporter: implications for the development of high resistance levels in trypanosomes.**

Ibrahim A. Teka, Anne J. N. Kazibwe, Nasser El-Sabbagh, Mohammed I. Al-Salabi, Christopher P. Ward, Anthonius A. Eze, Jane C. Munday, Pascal Mäser, Enock Matovu, Michael P. Barrett and Harry P. de Koning

### **Supplementary material**

#### Results

*Verification of the identity of the  $tbat1^{-/-}$  cell line by PCR of resistance markers.*

To confirm the identity of the  $tbat1^{-/-}$  cell line prior to adaptation with diminazene aceturate, DNA extracted from an FTA® card (Whatman) spotted with a bloodstream form culture was PCR amplified for the neomycin gene, which is one of the markers that was used in the plasmid construction of the  $tbat1^{-/-}$  cell line (Matovu et al., 2003). Amplification of the *TbATI* gene was also carried out as described (Kazibwe et al., 2009). The *TbATI* knock-out cell line was also tested against neomycin in culture. Wild type *T. brucei* (s427) with TbAT1/P2 activity was included in each test as a control. Amplification of the 800 bp size fragment of the neomycin gene (Fig. S2,

panel A) and lack of amplification of the 1400 bp fragment which corresponds to the *TbAT1* gene open reading frame (Fig. S2, panel B), confirmed the identity of the cell line. The cell line was also resistant to 1.5 µg/ml of neomycin in culture, unlike wild type *T. brucei* which was susceptible, thus further confirming its identity.
